# Supplementary material
Source: Springer Nature journal article supplement (https://www.springermedizin.de/resource/supplementary/13058_2013_3552_MOESM2_ESM.pdf/9703940)
Supplement: MOESM2 [file 9703940]

| Gene                           | Accession Number | Forward primer         | Reverse primer             |
|--------------------------------|------------------|------------------------|----------------------------|
| Estrogen receptor alpha (ESR1) | NM_007956.4      | GCCAAGGAGACTCGCTACTG   | CTCCGGTTCTTGCAATGGT        |
| Progesterone receptor (PgR)    | NM_008829.2      | GGTGGAGGTCGTACAAGCAT   | CTCATGGGTCACCTGGAGTT       |
| Elf5                           | NM_010125.3      | GGACTCCGTAACCCATAGCA   | TACTGGTCGCAGCAGAATTG       |
| $\beta$ -Casein (Csn2)         | NM_009972        | TCCACAACATTCCGTTTCTG   | AGCATGATCCAAGGTGAAAA       |
| HPRT                           | NM_013556        | CTGGTGAAAAGGACCTCTCG   | TGAAGTACTCATTATAGTCAAGGGCA |
| WAP                            | NM_011709.5      | GCCCAATGAAGATAGAATGCTC | GGCTGCTCACTGAAGGGTTA       |
| WAP-Cre transgene              | NA               | TAGTGAAACAGGGCAATGG    | GACAGCACAACAACCAGCAC       |
| RosaYFP for qPCR               | NA               | GTGGATCCGGAACCCCTAAT   | GTCGACGGTATCGATAAGCTA      |
| RosaYFP (genomic 578bp)        | NA               | CTTCCTCGTGATCTGCAAC    | AAGTCGTGCTGCTTCATGTG       |
